# Supplementary material for: The Properties of Black Locust Robinia pseudoacacia L. to Selectively Accumulate Chemical Elements from Soils of Ecologically Transformed Areas
Source: MDPI journal article supplement (doi:10.3390/f13010007), 2021-12-21
Supplement: s1 [file s1]

Supplement Table S1. Chemical composition of soils.

|    |     | Landfill | Coal dump | Urban park | Sandpit | Farmland |
|----|-----|----------|-----------|------------|---------|----------|
| Fe | %   | 2.24     | 2.07      | 1.07       | 0.70    | 0.79     |
| Ca |     | 0.20     | 0.83      | 0.47       | 0.41    | 0.06     |
| P  |     | 0.07     | 0.05      | 0.06       | 0.03    | 0.09     |
| Mg |     | 0.35     | 0.31      | 0.10       | 0.09    | 0.07     |
| Al |     | 0.83     | 0.45      | 0.40       | 0.40    | 0.57     |
| Na |     | <0.01    | <0.01     | <0.01      | <0.01   | <0.01    |
| K  |     | 0.15     | 0.10      | 0.09       | 0.06    | 0.07     |
| S  |     | 0.04     | 0.22      | 0.07       | 0.03    | 0.03     |
| Ti |     | 0.05     | 0.01      | 0.01       | 0.01    | 0.01     |
| Mo | ppm | 1.05     | 1.28      | 1.29       | 0.55    | 0.62     |
| Cu |     | 50.29    | 37.11     | 32.69      | 9.33    | 11.24    |
| Pb |     | 89.71    | 78.17     | 157.99     | 152.86  | 103.06   |
| Zn |     | 305.37   | 188.03    | 543.97     | 200.03  | 129.77   |
| Ni |     | 24.97    | 28.27     | 9.80       | 7.60    | 7.27     |
| Co |     | 8.97     | 11.57     | 4.33       | 3.10    | 4.20     |
| Mn |     | 442.67   | 387.33    | 242.00     | 218.00  | 487.00   |
| As |     | 7.07     | 4.23      | 11.77      | 8.87    | 8.97     |
| U  |     | 1.57     | 1.07      | 0.53       | 0.53    | 0.83     |
| Th |     | 5.93     | 3.50      | 0.77       | 1.30    | 0.37     |
| Sr |     | 18.67    | 36.17     | 17.27      | 20.97   | 6.83     |
| Cd |     | 2.50     | 1.30      | 3.91       | 3.24    | 1.41     |
| Sb |     | 1.03     | 2.48      | 1.20       | 0.80    | 0.71     |
| Bi |     | 0.55     | 0.48      | 0.40       | 0.16    | 0.24     |
| V  |     | 25.00    | 31.67     | 10.67      | 10.00   | 21.00    |
| La |     | 21.67    | 11.00     | 6.50       | 7.83    | 9.23     |
| Cr |     | 56.60    | 18.73     | 13.03      | 8.70    | 12.80    |
| Ba |     | 82.30    | 114.50    | 92.30      | 90.90   | 66.40    |
| B  |     | 0.00     | 0.00      | 0.00       | 0.00    | 0.00     |
| W  |     | 0.23     | 0.20      | 0.63       | 0.23    | 0.30     |
| Sc |     | 3.73     | 3.27      | 1.13       | 1.20    | 0.67     |
| Tl |     | 0.32     | 0.48      | 0.34       | 0.33    | 0.29     |
| Se |     | 0.33     | 1.07      | 0.70       | 0.30    | 0.40     |
| Te |     | 0.02     | 0.04      | 0.02       | 0.02    | 0.00     |
| Ga |     | 4.63     | 2.30      | 1.60       | 1.50    | 2.23     |
| Cs |     | 2.23     | 2.67      | 0.84       | 0.87    | 0.87     |
| Ge |     | 0.03     | 0.07      | 0.00       | 0.00    | 0.00     |
| Hf |     | 0.02     | 0.03      | 0.00       | 0.00    | 0.00     |
| Nb |     | 0.80     | 0.33      | 0.28       | 0.33    | 0.22     |
| Rb |     | 18.70    | 14.90     | 6.33       | 8.17    | 11.00    |
| Sn |     | 3.10     | 2.20      | 6.50       | 1.50    | 1.50     |
| Ta |     | 0.00     | 0.00      | 0.00       | 0.00    | 0.00     |
| Zr |     | 1.47     | 1.50      | 0.47       | 0.40    | 0.13     |
| Y  |     | 10.29    | 6.14      | 4.33       | 3.81    | 3.42     |
| Ce |     | 42.70    | 25.57     | 13.67      | 16.63   | 18.53    |
| In |     | 0.02     | 0.02      | 0.01       | 0.01    | 0.01     |
| Be |     | 0.87     | 0.93      | 0.77       | 0.33    | 0.37     |
| Li |     | 16.27    | 8.53      | 4.00       | 3.47    | 4.87     |
| Ag | ppb | 401.67   | 173.00    | 290.00     | 133.00  | 162.00   |
| Au |     | 9.57     | 1.67      | 0.97       | 0.63    | 0.80     |
| Hg |     | 144.00   | 262.33    | 155.33     | 47.67   | 66.67    |
| Re |     | 0.00     | 0.00      | 0.00       | 0.00    | 0.00     |
| Pd |     | 26.67    | 0.00      | 36.33      | 23.33   | 10.67    |
| Pt |     | 0.67     | 1.67      | 1.33       | 1.00    | 0.00     |

Supplement Table S2. Chemical composition of *Robinia pseudoacacia* parts.

|    |     | Landfill |          |       | Coal dump |          |       | Urban park |          |       | Sandpit |          |       | Farmland |          |       |
|----|-----|----------|----------|-------|-----------|----------|-------|------------|----------|-------|---------|----------|-------|----------|----------|-------|
|    |     | Leaves   | Branches | Seeds | Leaves    | Branches | Seeds | Leaves     | Branches | Seeds | Leaves  | Branches | Seeds | Leaves   | Branches | Seeds |
| Fe | %   | 0.03     | 0.01     | 0.01  | 0.02      | 0.01     | 0.01  | 0.02       | 0.01     | 0.01  | 0.01    | 0.01     | 0.01  | 0.02     | 0.03     | 0.01  |
| Ca |     | 2.38     | 1.47     | 0.53  | 1.72      | 0.97     | 0.36  | 1.76       | 1.05     | 0.43  | 1.14    | 1.19     | 0.48  | 1.16     | 0.64     | 0.39  |
| P  |     | 0.16     | 0.08     | 0.27  | 0.14      | 0.07     | 0.19  | 0.16       | 0.15     | 0.25  | 0.19    | 0.14     | 0.20  | 0.14     | 0.08     | 0.13  |
| Mg |     | 0.14     | 0.10     | 0.09  | 0.26      | 0.10     | 0.11  | 0.10       | 0.08     | 0.09  | 0.16    | 0.13     | 0.10  | 0.11     | 0.04     | 0.10  |
| Al |     | <0.01    | <0.01    | <0.01 | <0.01     | <0.01    | <0.01 | <0.01      | <0.01    | <0.01 | <0.01   | <0.01    | <0.01 | <0.01    | <0.01    | <0.01 |
| Na |     | <0.01    | <0.01    | <0.01 | <0.01     | <0.01    | <0.01 | <0.01      | <0.01    | <0.01 | <0.01   | <0.01    | <0.01 | <0.01    | <0.01    | <0.01 |
| K  |     | 1.50     | 0.97     | 2.20  | 1.36      | 0.64     | 2.07  | 1.35       | 0.80     | 1.86  | 1.30    | 1.01     | 1.36  | 1.48     | 0.49     | 1.23  |
| S  |     | 0.17     | 0.13     | 0.20  | 0.28      | 0.13     | 0.30  | 0.16       | 0.14     | 0.09  | 0.18    | 0.17     | 0.13  | 0.22     | 0.09     | 0.20  |
| Ti | ppm | 7.00     | 3.33     | 9.33  | 7.00      | 4.00     | 5.67  | 8.00       | 5.00     | 8.67  | 8.33    | 4.67     | 8.33  | 7.33     | 6.67     | 4.67  |
| Mo |     | 1.31     | 1.91     | 2.66  | 1.79      | 6.37     | 9.51  | 2.01       | 7.61     | 2.64  | 0.52    | 3.40     | 2.59  | 0.14     | 0.13     | 0.30  |
| Cu |     | 8.47     | 9.48     | 10.60 | 6.10      | 7.07     | 6.83  | 3.93       | 7.21     | 4.98  | 6.39    | 6.47     | 6.96  | 9.04     | 8.69     | 6.52  |
| Pb |     | 2.70     | 3.17     | 0.75  | 3.28      | 3.51     | 0.52  | 2.93       | 1.74     | 1.21  | 3.46    | 8.02     | 2.53  | 4.12     | 16.35    | 4.91  |
| Zn |     | 103.37   | 94.93    | 60.90 | 30.33     | 27.60    | 23.77 | 61.67      | 80.63    | 49.67 | 44.40   | 61.93    | 46.37 | 94.53    | 103.80   | 54.27 |
| Ni |     | 3.17     | 4.63     | 6.20  | 1.03      | 1.53     | 3.17  | 0.30       | 0.90     | 0.57  | 0.40    | 0.67     | 0.47  | 2.57     | 4.93     | 1.93  |
| Co |     | 0.22     | 0.17     | 0.27  | 0.12      | 0.07     | 0.07  | 0.07       | 0.05     | 0.03  | 0.05    | 0.07     | 0.03  | 0.10     | 0.17     | 0.09  |
| Mn |     | 167.67   | 27.00    | 43.00 | 23.33     | 8.33     | 11.67 | 17.00      | 8.67     | 10.67 | 25.00   | 12.00    | 16.33 | 157.00   | 39.33    | 29.33 |
| As |     | 0.23     | 0.00     | 0.03  | 0.10      | 0.03     | 0.00  | 0.27       | 0.03     | 0.00  | 0.00    | 0.00     | 0.00  | 0.03     | 0.13     | 0.03  |
| U  |     | 0.00     | 0.00     | 0.00  | 0.00      | 0.00     | 0.00  | 0.02       | 0.00     | 0.00  | 0.00    | 0.00     | 0.00  | 0.00     | 0.00     | 0.00  |
| Th |     | 0.00     | 0.00     | 0.00  | 0.00      | 0.00     | 0.00  | 0.00       | 0.00     | 0.03  | 0.00    | 0.00     | 0.00  | 0.00     | 0.00     | 0.07  |
| Sr |     | 122.53   | 104.47   | 28.90 | 61.97     | 55.20    | 16.13 | 32.73      | 28.00    | 8.53  | 19.87   | 34.87    | 9.53  | 35.70    | 32.50    | 12.50 |
| Cd |     | 0.58     | 0.63     | 0.18  | 0.26      | 0.15     | 0.06  | 0.20       | 0.19     | 0.09  | 0.37    | 0.89     | 0.37  | 0.77     | 1.18     | 0.51  |
| Sb |     | 0.11     | 0.10     | 0.01  | 0.08      | 0.03     | 0.00  | 0.11       | 0.04     | 0.04  | 0.06    | 0.05     | 0.03  | 0.07     | 0.19     | 0.10  |
| Bi |     | 0.00     | 0.00     | 0.00  | 0.00      | 0.00     | 0.00  | 0.00       | 0.00     | 0.00  | 0.00    | 0.00     | 0.00  | 0.00     | 0.04     | 0.00  |
| V  |     | 0.00     | 0.00     | 0.00  | 0.00      | 0.00     | 0.00  | 0.00       | 0.00     | 0.00  | 0.00    | 0.00     | 0.00  | 0.00     | 0.00     | 0.00  |
| La |     | 0.81     | 0.20     | 0.06  | 0.03      | 0.01     | 0.00  | 0.03       | 0.00     | 0.00  | 0.03    | 0.02     | 0.00  | 0.17     | 0.26     | 0.06  |
| Cr |     | 1.40     | 1.60     | 1.17  | 1.47      | 1.23     | 1.63  | 1.53       | 1.77     | 1.30  | 1.33    | 1.73     | 1.17  | 1.30     | 1.60     | 1.67  |
| Ba |     | 79.10    | 28.63    | 19.53 | 13.17     | 5.70     | 3.17  | 23.47      | 7.57     | 5.80  | 21.83   | 23.00    | 12.93 | 49.07    | 28.87    | 19.00 |
| B  |     | 52.00    | 19.33    | 27.33 | 59.33     | 18.67    | 20.67 | 96.33      | 28.67    | 33.67 | 45.00   | 22.33    | 27.33 | 29.33    | 25.33    | 22.00 |
| W  |     | 0.00     | 0.00     | 0.00  | 0.00      | 0.00     | 0.00  | 0.00       | 0.00     | 0.00  | 0.00    | 0.00     | 0.00  | 0.00     | 0.00     | 0.03  |
| Sc |     | 0.30     | 0.33     | 0.40  | 0.30      | 0.27     | 0.43  | 0.30       | 0.40     | 0.47  | 0.33    | 0.33     | 0.33  | 0.37     | 0.37     | 0.40  |
| Tl |     | 0.00     | 0.01     | 0.00  | 0.03      | 0.05     | 0.00  | 0.00       | 0.00     | 0.00  | 0.00    | 0.09     | 0.00  | 0.04     | 0.07     | 0.01  |
| Se |     | 0.00     | 0.00     | 0.00  | 0.13      | 0.00     | 0.00  | 0.60       | 0.27     | 0.50  | 0.20    | 0.10     | 0.13  | 0.00     | 0.00     | 0.00  |
| Te |     | 0.00     | 0.00     | 0.00  | 0.00      | 0.00     | 0.01  | 0.00       | 0.00     | 0.00  | 0.00    | 0.00     | 0.00  | 0.00     | 0.00     | 0.00  |
| Ga |     | 0.00     | 0.00     | 0.00  | 0.00      | 0.00     | 0.00  | 0.00       | 0.00     | 0.00  | 0.00    | 0.00     | 0.00  | 0.00     | 0.00     | 0.00  |
| Cs |     | 0.15     | 0.06     | 0.13  | 1.79      | 0.83     | 3.29  | 0.01       | 0.00     | 0.00  | 0.05    | 0.05     | 0.05  | 0.00     | 0.00     | 0.00  |
| Ge |     | 0.05     | 0.04     | 0.06  | 0.05      | 0.02     | 0.02  | 0.05       | 0.03     | 0.05  | 0.03    | 0.02     | 0.04  | 0.06     | 0.02     | 0.01  |

[illegible]
